# Supplementary material for: A model for two-electron mixed valence in metal–metal bonded dirhodium compounds
Source: Royal Society of Chemistry journal article supplement (doi:10.1039/b410003d), 2005-01-01
Supplement: b410003d-esi.pdf [file b410003d-esi.pdf]

Supporting Information for

**A model for two-electron mixed valence in metal-metal bonded dirhodium compounds**

Thomas G. Gray and Daniel G. Nocera\*

*Department of Chemistry, 6-335, Massachusetts Institute of Technology, 77 Massachusetts Avenue,  
Cambridge, MA 02139-4307*

| <i>Index</i>                                                                                              | <b>Page</b> |
|-----------------------------------------------------------------------------------------------------------|-------------|
| Computational details                                                                                     | S1-S3       |
| Table S1. Optimized Cartesian coordinates for triplet <b>4</b>                                            | S4          |
| Table S2. Optimized Cartesian coordinates for singlet <b>5</b>                                            | S5          |
| Table S3. Optimized Cartesian coordinates for square-planar, singlet Rh(PF <sub>3</sub> ) <sub>3</sub> Cl | S6          |
| Figure S1. Kohn-Sham orbital energies of <b>4</b>                                                         | S7          |

**Computational Details.** Calculations were performed within the Gaussian 98 Program suite.<sup>1</sup> DFT computations employed the exchange functional of Becke<sup>2</sup> and the correlation functional of Perdew.<sup>3</sup> The default “extrafine” grid was used throughout. Self-consistent field convergence was achieved with direct methods. Equilibrium geometries were optimized or partially optimized in redundant internal coordinates.<sup>4</sup> Relativistic effective core potentials were used for rhodium along with the standard Hay-Wadt double- $\zeta$  basis set,<sup>5-7</sup> augmented by the optimized Rh 6p-function of Couty and Hall.<sup>8</sup> The 6-31G(d,p) basis of Pople and co-workers<sup>9,10</sup> was applied to all other atoms. Tight self-consistent field convergence criteria were maintained throughout. Reported energies and relative energies are electronic energies, and are not corrected for zero-point vibrational energies, since we deliberately consider structures that are not minima on the relevant potential energy hypersurface. Stability tests found all converged self-consistent fields to be stable to internal and external perturbations. Canonical Kohn-Sham orbitals were imaged with the program Molekel; default isodensity values were applied.<sup>11</sup> Extended Hückel calculations were carried out with the program Cacao, using default parameters.<sup>12</sup>

Model complex **4** was optimized within  $D_{3d}$ -symmetry. Being Jahn-Teller unstable, **4** is not expected to be a potential-energy minimum, and a harmonic frequency calculation indicates it is not, with seven imaginary frequencies corresponding to  $PF_3$  librations or rotations.

The geometry of the singlet, square-planar complex  $Rh(PF_3)_3Cl$  was first optimized with spin-unrestricted methods, and a harmonic frequency calculation indicated the converged structure to be a minimum. The structure was then re-optimized in a spin-unrestricted calculation; the optimizer converged on the first cycle. A spin-unrestricted frequency calculation was not attempted. The energy difference ( $260 \text{ kJ mol}^{-1}$ ) reported for  $Rh(PF_3)_3Cl$  and **4** is the difference in calculated electronic energies; this difference more directly reflects the Jahn-Teller destabilization of **4**. As such, it has not been “corrected” for entropy or zero-point energy, and we therefore report this relative energy to two significant figures.

The geometry of model compound **5** was optimized in a spin-restricted fashion, with singlet multiplicity, and then re-optimized with a spin-unrestricted calculation. The Rh–Rh

distance was constrained to be 3.12 Å; consequently, neither optimized structure is an energy-minimum. Orbital eigenvalues depicted in Figure 3 are those of the spin-unrestricted calculation, to enable comparison to the eigenvalues of **4**. Because **5** is a spin-singlet, spin- $\alpha$  and spin- $\beta$  eigenvalues are equal (the density does not break symmetry), and no distinction between spins is made in Figure 3.

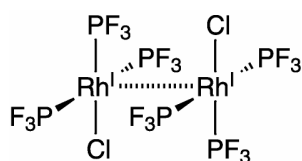

## References

1. Frisch, M. J.; Trucks, G. W.; Schlegel, H. B.; Scuseria, G. E.; Robb, M. A.; Cheeseman, J. R.; Zakrzewski, V. G.; Montgomery, J. A., Jr.; Stratmann, R. E.; Burant, J. C.; Dapprich, S.; Millam, J. M.; Daniels, A. D.; Kudin, K. N.; Strain, M. C.; Farkas, O.; Tomasi, J.; Barone, V.; Cossi, M.; Cammi, R.; Mennucci, B.; Pomelli, C.; Adamo, C.; Clifford, S.; Ochterski, J.; Petersson, G. A.; Ayala, P. Y.; Cui, Q.; Morokuma, K.; Malick, D. K.; Rabuck, A. D.; Raghavachari, K.; Foresman, J. B.; Cioslowski, J.; Ortiz, J. V.; Stefanov, B. B.; Liu, G.; Liashenko, A.; Piskorz, P.; Komaromi, I.; Gomperts, R.; Martin, R. L.; Fox, D. J.; Keith, T.; Al-Laham, M. A.; Peng, C. Y.; Nanayakkara, A.; Gonzalez, C.; Challacombe, M.; Gill, P. M. W.; Johnson, B. G.; Chen, W.; Wong, M. W.; Andres, J. L.; Head-Gordon, M.; Replogle, E. S.; Pople, J. A.; Gaussian 98, Revision A.9: Gaussian, Inc.: Pittsburg, PA, 1998.
2. Becke, A. D. *Phys. Rev. A* **1988**, *38*, 3098-3100.
3. Perdew, J. P. *Phys. Rev. B* **1986**, *33*, 8822-8824.
4. Peng, C.; Ayala, P. Y.; Schlegel, H. B.; Frisch, M. J. *J. Comput. Chem.* **1996**, *17*, 49-56.
5. Hay, P. J.; Wadt, W. R. *J. Chem. Phys.* **1985**, *82*, 270-283.

6. Wadt, W. R.; Hay, P. J. *J. Chem. Phys.* **1985**, *82*, 284-298.
7. Hay, P. J.; Wadt, W. R. *J. Chem. Phys.* **1985**, *82*, 299-310.
8. Couty, M.; Hall, M. B. *J. Comput. Chem.* **1996**, *17*, 1359-1370.
9. Hariharan, P. C.; Pople, J. A. *Theor. Chim. Acta* **1973**, *28*, 213-222.
10. Francl, M. M.; Pietro, W. J.; Hehre, W. J.; Binkley, J. S.; Gordon, M. S.; DeFrees, D. J.; Pople, J. A. *J. Chem. Phys.* **1982**, *77*, 3654-3655
11. (a) Flükiger, P.; Lüthi, H. P.; Portmann, S.; Weber, J. MOLEKEL 4.3; Swiss Center for Scientific Computing: Manno, Switzerland, 2000-2002. (b) Portmann, S.; Lüthi, H. P. *CHIMIA* **2000**, *54*, 766-770.
12. Mealli, C.; Proserpio, D. M. MO Theory Made Visible, *J. Chem. Ed.* **1990**, *67*, 399-402.

**Table S1.** Optimized Cartesian coordinates for triplet 4

| <i>Atom</i> | <i>x</i>      | <i>y</i>      | <i>z</i>      |
|-------------|---------------|---------------|---------------|
| Rh          | 0             | 0             | 1.2736521716  |
| P           | 0             | 2.308275851   | 1.6859798662  |
| F           | 0             | 2.8406714162  | 3.1804150726  |
| F           | -1.2206762546 | 3.1958324392  | 1.1603733671  |
| F           | 1.2206762546  | 3.1958324392  | 1.1603733671  |
| P           | -1.9990255259 | -1.1541379255 | 1.6859798662  |
| F           | -3.3780102059 | -0.5407795733 | 1.1603733671  |
| F           | -2.1573339513 | -2.6550528659 | 1.1603733671  |
| F           | -2.4600936102 | -1.4203357081 | 3.1804150726  |
| P           | 1.9990255259  | -1.1541379255 | 1.6859798662  |
| F           | 3.3780102059  | -0.5407795733 | 1.1603733671  |
| F           | 2.4600936102  | -1.4203357081 | 3.1804150726  |
| F           | 2.1573339513  | -2.6550528659 | 1.1603733671  |
| Cl          | 0             | 0             | 3.819471592   |
| Rh          | 0             | 0             | -1.2736521716 |
| P           | 0             | -2.308275851  | -1.6859798662 |
| F           | 0             | -2.8406714162 | -3.1804150726 |
| F           | 1.2206762546  | -3.1958324392 | -1.1603733671 |
| F           | -1.2206762546 | -3.1958324392 | -1.1603733671 |
| P           | -1.9990255259 | 1.1541379255  | -1.6859798662 |
| F           | -2.4600936102 | 1.4203357081  | -3.1804150726 |
| F           | -3.3780102059 | 0.5407795733  | -1.1603733671 |
| F           | -2.1573339513 | 2.6550528659  | -1.1603733671 |
| P           | 1.9990255259  | 1.1541379255  | -1.6859798662 |
| F           | 2.1573339513  | 2.6550528659  | -1.1603733671 |
| F           | 3.3780102059  | 0.5407795733  | -1.1603733671 |
| F           | 2.4600936102  | 1.4203357081  | -3.1804150726 |
| Cl          | 0             | 0             | -3.819471592  |

**Table S2.** Optimized Cartesian coordinates for singlet **5**

| <i>Atom</i> | <i>x</i>      | <i>y</i>      | <i>z</i>      |
|-------------|---------------|---------------|---------------|
| Rh          | -0.475460963  | 0.            | 1.4790299493  |
| Cl          | 1.8715238841  | 0.            | 1.9559552266  |
| P           | -0.3233308807 | 2.192446212   | 1.9799795325  |
| P           | -2.6601376565 | 0.            | 1.2667405208  |
| P           | -0.3233308807 | -2.192446212  | 1.9799795325  |
| Rh          | 0.475460963   | 0.            | -1.4790299493 |
| Cl          | -1.8715238841 | 0.            | -1.9559552266 |
| P           | 0.3233308807  | 2.192446212   | -1.9799795325 |
| P           | 2.6601376565  | 0.            | -1.2667405208 |
| P           | 0.3233308807  | -2.192446212  | -1.9799795325 |
| F           | 0.0574363905  | 2.4788656883  | 3.4968552537  |
| F           | -1.5778804427 | 3.1709255529  | 1.8528644729  |
| F           | 0.7830382977  | 3.1006636991  | 1.2755267906  |
| F           | -3.4579682186 | 0.            | 2.6550121885  |
| F           | -3.412904211  | -1.2249401342 | 0.5913786882  |
| F           | -3.412904211  | 1.2249401342  | 0.5913786882  |
| F           | 0.0574363905  | -2.4788656883 | 3.4968552537  |
| F           | 0.7830382977  | -3.1006636991 | 1.2755267906  |
| F           | -1.5778804427 | -3.1709255529 | 1.8528644729  |
| F           | -0.0574363905 | 2.4788656883  | -3.4968552537 |
| F           | 1.5778804427  | 3.1709255529  | -1.8528644729 |
| F           | -0.7830382977 | 3.1006636991  | -1.2755267906 |
| F           | 3.4579682186  | 0.            | -2.6550121885 |
| F           | 3.412904211   | -1.2249401342 | -0.5913786882 |
| F           | 3.412904211   | 1.2249401342  | -0.5913786882 |
| F           | -0.0574363905 | -2.4788656883 | -3.4968552537 |
| F           | -0.7830382977 | -3.1006636991 | -1.2755267906 |
| F           | 1.5778804427  | -3.1709255529 | -1.8528644729 |

**Table S3.** Optimized Cartesian coordinates for square-planar, singlet Rh(PF<sub>3</sub>)<sub>3</sub>Cl

| <i>Atom</i> | <i>x</i>      | <i>y</i>      | <i>z</i>      |
|-------------|---------------|---------------|---------------|
| Rh          | 0.2369880467  | 0.            | 0.0672618637  |
| Cl          | 2.4850540903  | 0.            | 0.8523070267  |
| P           | 0.4325951238  | 2.2466006649  | 0.2194843461  |
| P           | -1.7722741247 | 0.            | -0.747225381  |
| P           | 0.4325951238  | -2.2466006649 | 0.2194843461  |
| F           | 0.8291363717  | 2.820044808   | 1.6443771589  |
| F           | -0.8113009492 | 3.1964662279  | -0.0916215665 |
| F           | 1.5255624608  | 2.9602843929  | -0.6841336282 |
| F           | -3.0482637005 | 0.            | 0.2154801521  |
| F           | -2.2028284486 | -1.2128105824 | -1.6925927618 |
| F           | -2.2028284486 | 1.2128105824  | -1.6925927618 |
| F           | 0.8291363717  | -2.820044808  | 1.6443771589  |
| F           | 1.5255624608  | -2.9602843929 | -0.6841336282 |
| F           | -0.8113009492 | -3.1964662279 | -0.0916215665 |

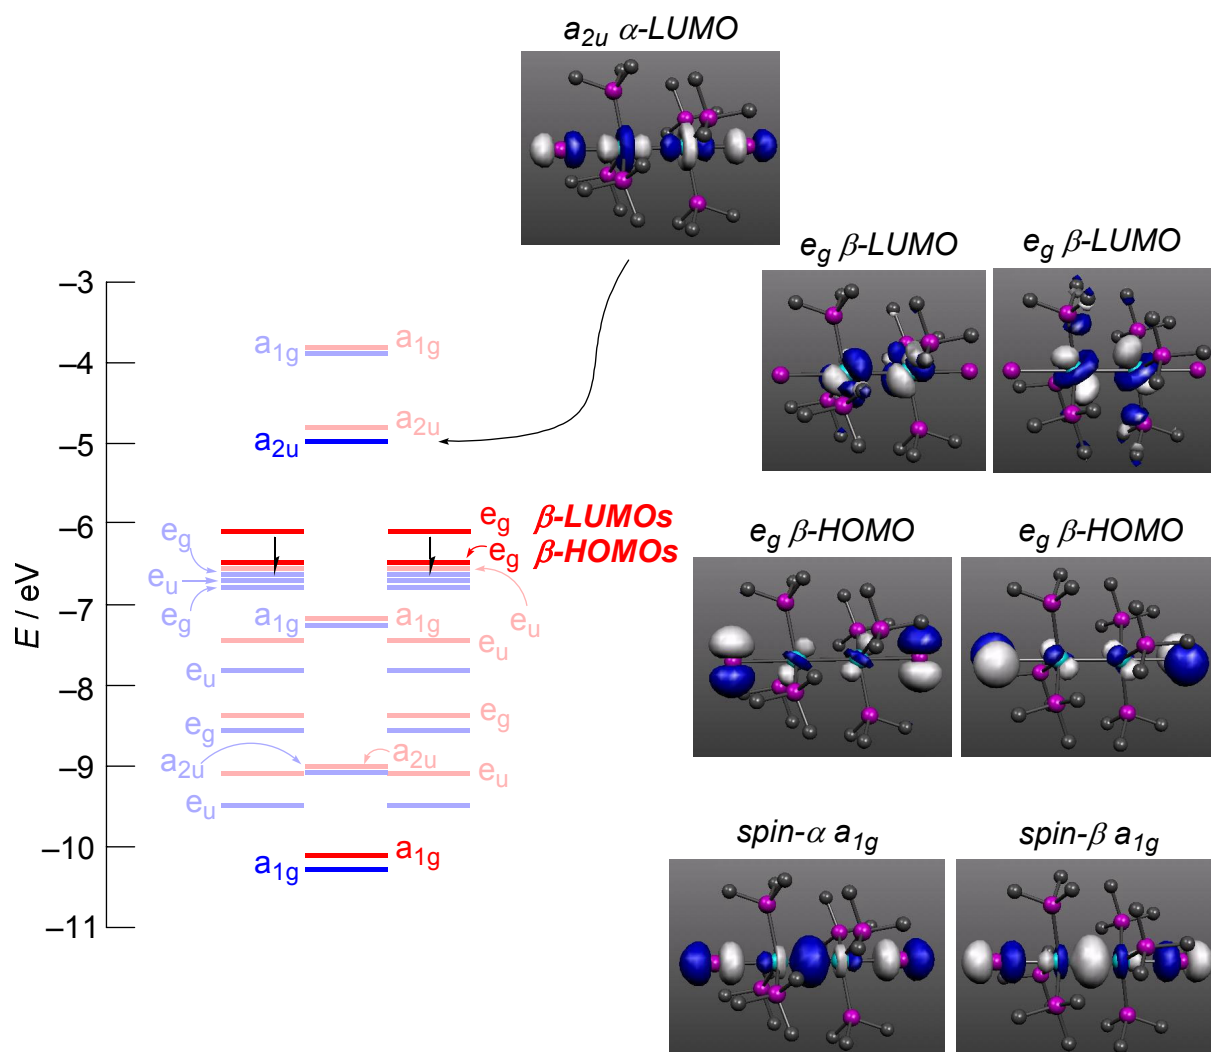

**Figure S1.** Kohn-Sham orbital energies of 4. Images of selected orbitals are inset. Blue indicates spin- $\alpha$ ; red, spin- $\beta$ .
